# Supplementary material for: Drivers of house invasion by sylvatic Chagas disease vectors in the Amazon-Cerrado transition: A multi-year, state-wide assessment of municipality-aggregated surveillance data
Source: PubMed Central journal article supplement (PMC5689836; doi:10.1371/journal.pntd.0006035), 2017-11-16
Supplement: pntd.0006035.s008.pdf [file pntd.0006035.s008.pdf]

**S4 Table. *Rhodnius robustus* zero-inflated negative binomial generalized linear models.** Model-averaged coefficients, unconditional standard errors (SE), and 95% confidence interval limits ( $CI_{lower}$ ,  $CI_{upper}$ ) from 219 models fitted for this species.

| Category                                                                      | Covariate           | Estimate | SE   | $CI_{lower}$ | $CI_{upper}$ |
|-------------------------------------------------------------------------------|---------------------|----------|------|--------------|--------------|
| Negative binomial (count) part – modeling the number of house invasion events |                     |          |      |              |              |
| Intercept                                                                     | -                   | -7.85    | 3.04 | -13.81       | -1.89        |
| Regional-scale                                                                | <i>Amazon</i>       | 0.53     | 0.43 | -0.32        | 1.38         |
| Landscape-scale                                                               | <i>Preserved</i>    | 0.23     | 0.27 | -0.31        | 0.76         |
|                                                                               | <i>Intermediate</i> | 0.18     | 0.24 | -0.29        | 0.65         |
|                                                                               | <i>Disturbed</i>    | -0.36    | 0.27 | -0.89        | 0.16         |
|                                                                               | <i>NDVI</i>         | -0.71    | 0.49 | -1.67        | 0.25         |
| Climate                                                                       | <i>Day</i>          | -1.37    | 0.60 | -2.55        | -0.18        |
|                                                                               | <i>Night</i>        | -0.08    | 0.43 | -0.92        | 0.76         |
|                                                                               | $\Delta T$          | -1.00    | 0.61 | -2.20        | 0.20         |
|                                                                               | <i>Rain</i>         | -0.87    | 0.40 | -1.66        | -0.08        |
| Confounders                                                                   | <i>House</i>        | 1.07     | 0.44 | 0.21         | 1.94         |
|                                                                               | <i>HDI</i>          | 0.34     | 0.60 | -0.84        | 1.52         |
| Binomial (zero inflation) part – modeling the odds of species <i>absence</i>  |                     |          |      |              |              |
| Intercept                                                                     | -                   | 1.52     | 0.74 | 0.07         | 2.97         |
| Regional-scale                                                                | <i>Amazon</i>       | -0.03    | 0.66 | -1.32        | 1.27         |
| Climate                                                                       | <i>Day</i>          | 3.27     | 1.00 | 1.30         | 5.23         |
|                                                                               | $\Delta T$          | 3.10     | 0.89 | 1.36         | 4.85         |
|                                                                               | <i>Rain</i>         | -0.02    | 0.70 | -1.39        | 1.35         |

Since all covariates were standardized, effect estimates measure the expected increase or decrease in house-invasion event counts for each one-standard deviation increase (from the zero mean) in the covariate value (see S1 Table)

*NDVI*, the Normalized Difference Vegetation Index, was used as a single-figure alternative to landscape-scale disturbance classes;  $\Delta T$ , temperature amplitude, or the difference between diurnal and nocturnal mean temperatures
